# Supplementary material for: Polymeric Nanoparticles Enable mRNA Transfection and Its Translation in Intervertebral Disc and Human Joint Cells, Except for M1 Macrophages
Source: MDPI journal article supplement (doi:10.3390/pharmaceutics16040438), 2024-03-22
Supplement: s1 [file s1]

# Polymeric nanoparticles enable mRNA transfection and its translation in intervertebral disc and human joint cells, except for M1 macrophages

\*Laura B. Creemers is the corresponding author; she can be reached by following email address:  
l.b.creemers@umcutrecht.nl

## Supplementary figures

**A** uncoated – EGFP mRNA

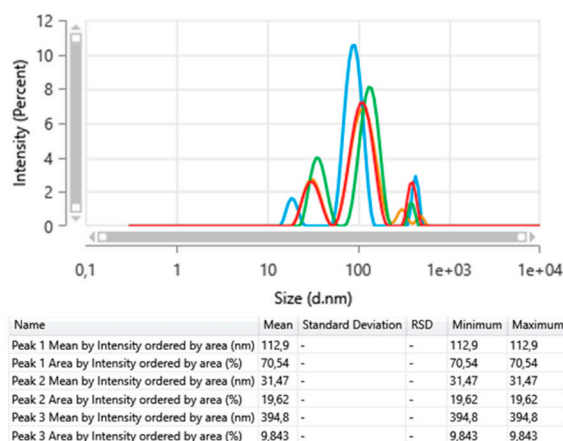

**B** uncoated – EGFP mRNA + Cy3 siRNA

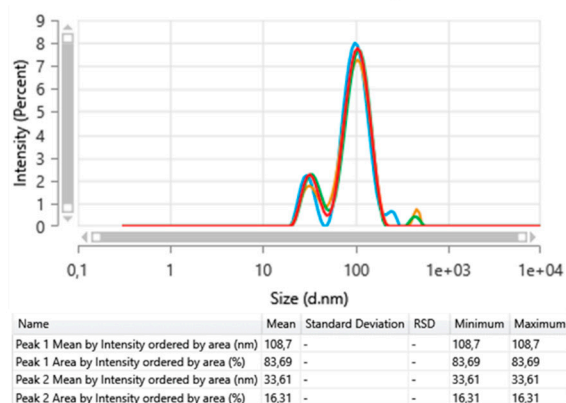

**C** PGA-PEG coated – EGFP mRNA

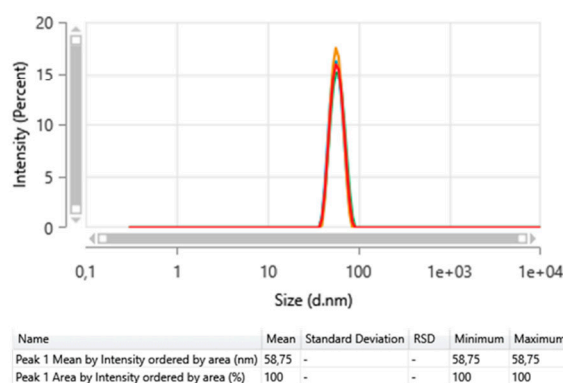

**D** PGA-PEG coated – EGFP mRNA + Cy3 siRNA

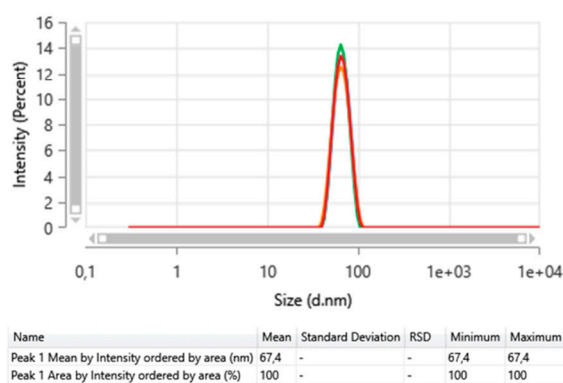

Figure S1: Multi-angle Dynamic Light Scattering (MADLS) data for all nanoparticle types investigated. Red curve is the combined data of three angles, 175° (blue), 90° (orange) and 13° (green), with three individual measurements per angle. For A, the table shows that for Peak 1, 70.54% of the readouts fall within the mean particle size of 112.9 nm. For Peak 2, 19.62% of the measurements fall within the mean diameter of 31.47 nm, and so on. Uncoated nanoparticles A and B are not monodisperse, as multiple peaks are seen. For PGA-PEG coated nanoparticles C and D, we can assume monodispersity as 100% of the measurements fall within a single peak of intensity values from the tables refer only to the red curve in the size distribution.

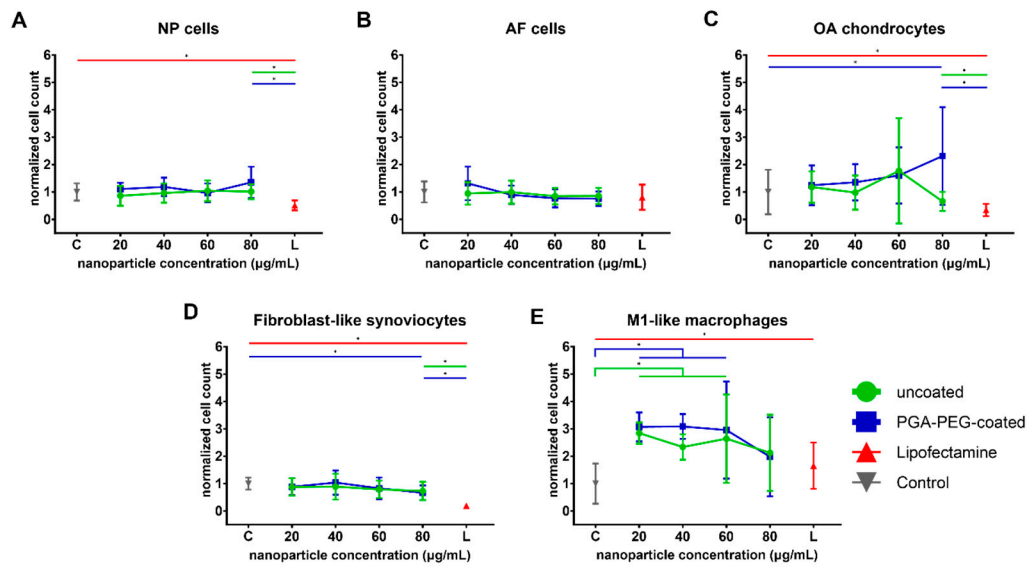

Figure S2: Cell count determined as Hoechst-positive cells for A: NP cells, B: AF cells, C: OA chondrocytes, D: fibroblast-like synoviocytes and E: M1-like macrophages. mRNA concentration of Lipofectamine control (red) is 3.2  $\mu\text{g/mL}$ . Values were normalized to control.

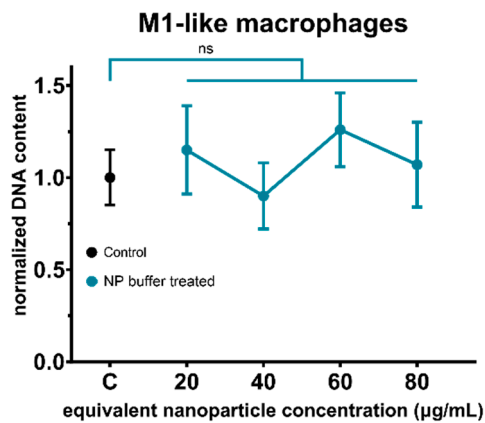

Figure S3: PicoGreen analysis of M1-like macrophages treated with nanoparticle buffer. Concentrations of buffer are equivalent to the buffer concentrations used in the dose response experiments using nanoparticles in buffer. Data of 6 replicates from 1 donor.
